# Supplementary material
Source: PubMed Central journal article supplement (PMC3615197)

**Supplemental figure 1.** Change in body weight during the 10 weeks before final studies were performed in laparoscopic adjustable gastric banding (LAGB) and Roux-en-Y gastric bypass (RYGB) subjects.

**Supplemental figure 2.** Bile acid composition (ng/mL) before and after 20% weight loss induced by (A) laparoscopic adjustable gastric banding (LAGB) and (B) Roux-en-Y gastric bypass (RYGB) during fasting and postprandial conditions. Bile Acids: Primary (cholic acid [CA] and chenodeoxycholic acid [CDCA]), Secondary (deoxycholic acid [DCA], lithocholic acid [LCA] and ursodeoxycholic acid [UDCA]), Glycine Conjugated (glycocholic acid [GCA], glycodeoxycholic acid [GDCA], glycochenodeoxycholic acid (GCDCA), glycolithocholic acid [GLCA] and glyoursodeoxycholic acid [GUDCA]) and Taurine Conjugated (taurocholic acid [TCA], taurodeoxycholic acid [TDCA], taurochenodeoxycholic acid [TCDCA], tauroolithocholic acid [TLCA] and taoursodeoxycholic acid [TUDCA]).

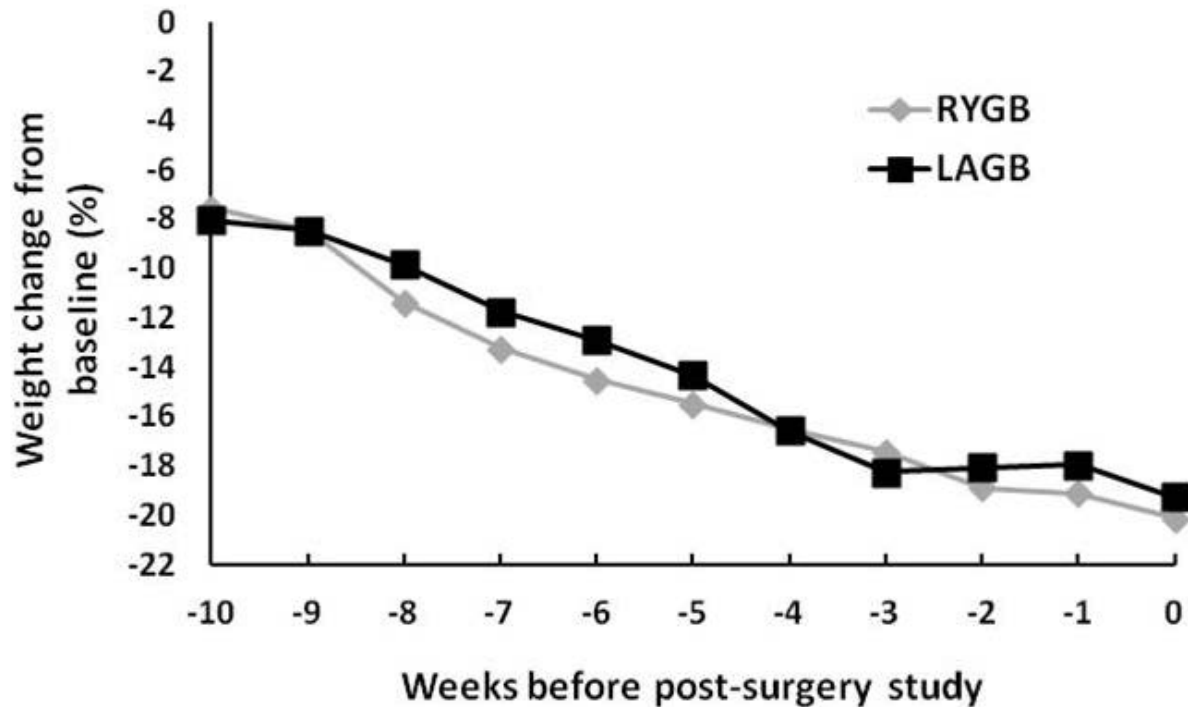

A

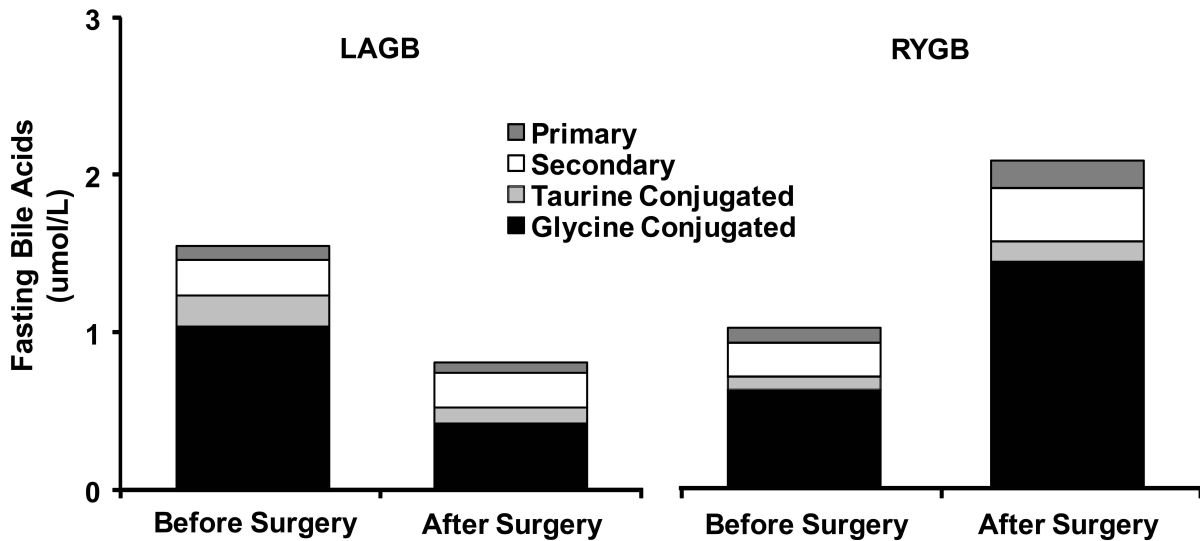

B

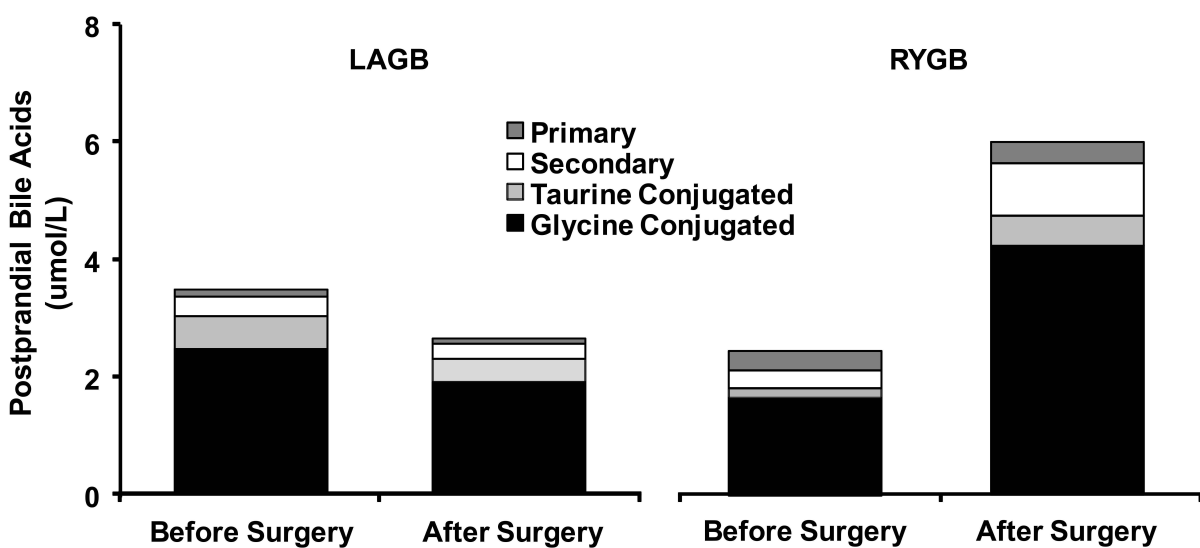

Supplement: supp_jc.2012-3736_JC-12-3736_2fig.pdf [file supp_jc.2012-3736_JC-12-3736_2fig.pdf]
